# Supplementary material
Source: Springer Nature journal article supplement (https://www.springermedizin.de/resource/supplementary/13023_2006_40_MOESM3_ESM.pdf/9641514)

000007

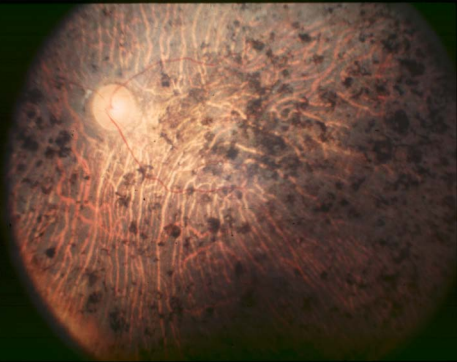

Supplement: MOESM3 [file 9641514]
